# Supplementary material for: Development and validation of a novel lateral flow immunoassay device for detection of aflatoxins in soy-based foods
Source: Royal Society of Chemistry journal article supplement (doi:10.1039/c7ay00601b), 2017-01-01
Supplement: c7ay00601b1.pdf [file c7ay00601b1.pdf]

***Supporting Information***

***For***

**Development and validation of a novel lateral flow  
immunoassay device for detection of aflatoxins in soy-based  
foods**

Vanessa O. Santos, Patrícia B. Pelegrini, Fernanda Mulinari, Ariane F. Lacerda,  
Rodrigo S. Moura, Ludimila P.V. Cardoso, Samira Bühler-Sékula, Robert N. G. Miller,  
Maria Fatima Grossi-de-Sa\*

\*Corresponding author:

Maria Fatima Grossi de Sa

Tel: +55 61 3448 4902

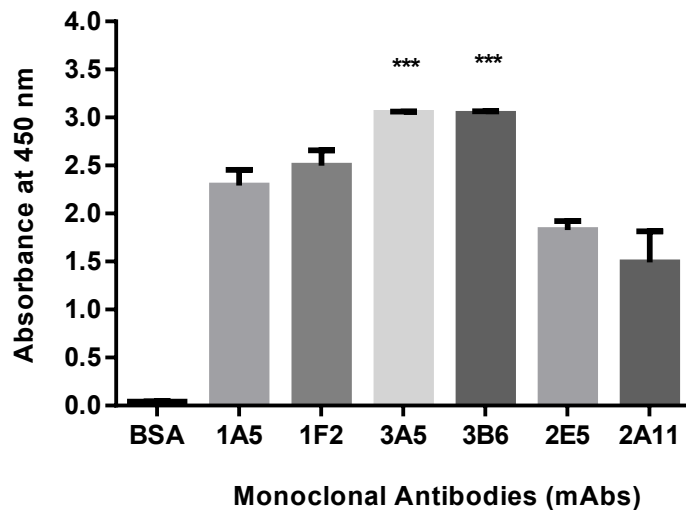

### S.1 Specificity of the mAbs for AFB1 by ELISA assay.

High binding EIA/RIA microplates were coated with 0.5  $\mu$ g of AFB1-BSA conjugate and kept overnight at 4°C. The plates were blocked with 3% gelatin in PBST. An aliquot of 100  $\mu$ L of each mAbs (1:3000) was added for 1h at 37°C. The binding was identified using a goat anti-mouse IgG-HRP (1:5000) and developed using 100  $\mu$ L of 4-(4-amino-3,5-dimethylphenyl)-2,6-dimethylaniline (TMB). The reaction was stopped by the addition of 50  $\mu$ L of 2M sulfuric acid, and the absorbance was measured at 450 nm. All statistic tests were performed using by two-way ANOVA. \*\*\*Denotes  $p < 0.05$ .
